# Supplementary material for: Spacer length-controlled assembly of [CunIn]-based coordination polymers from CuI and bis(4-phenylpyrimidine-2-thio)alkane ligands
Source: Royal Society of Chemistry journal article supplement (doi:10.1039/c2ce06312c), 2011-12-19
Supplement: c2ce06312c.pdf [file c2ce06312c.pdf]

## Electronic Supplementary Information (ESI)

### Spacer length-controlled assembly of $[\text{Cu}_n\text{I}_n]$ -based coordination polymers from CuI and bis(4-phenylpyrimidine-2-thio)alkane ligands

Xiao-Juan Yang,<sup>a</sup> Hong-Xi Li,<sup>\*a</sup> Zhong-Lin Xu,<sup>a</sup> Hai-Yan Li,<sup>a</sup> Zhi-Gang Ren,<sup>a</sup> and Jian-Ping Lang<sup>\*ab</sup>

<sup>a</sup> Key Laboratory of Organic Synthesis of Jiangsu Province, College of Chemistry, Chemical Engineering and Materials Science, Suzhou University, Suzhou 215123, Jiangsu, P. R. China.

<sup>b</sup> State Key Laboratory of Organometallic Chemistry, Shanghai Institute of Organic Chemistry, Chinese Academy of Sciences, Shanghai 200032, P. R. China

## Table of Contents

|                                                                                                                         |    |
|-------------------------------------------------------------------------------------------------------------------------|----|
| <b>Figure S1.</b> PXRD patterns for <b>1</b> .....                                                                      | S3 |
| <b>Figure S2.</b> PXRD patterns for <b>2</b> .....                                                                      | S3 |
| <b>Figure S3.</b> PXRD patterns for <b>3</b> .....                                                                      | S4 |
| <b>Figure S4.</b> PXRD patterns for <b>4</b> .....                                                                      | S4 |
| <b>Figure S5.</b> PXRD patterns for <b>5</b> .....                                                                      | S5 |
| <b>Figure S6.</b> PXRD patterns for <b>6</b> .....                                                                      | S5 |
| <b>Figure S7.</b> $\pi$ - $\pi$ interactions between the phenyl and pyrimidyl rings of bphpypr ligand of <b>3</b> ..... | S6 |
| <b>Figure S8.</b> $\pi$ - $\pi$ interactions between the phenyl and pyrimidyl rings of bphpypr ligand of <b>4</b> ..... | S6 |

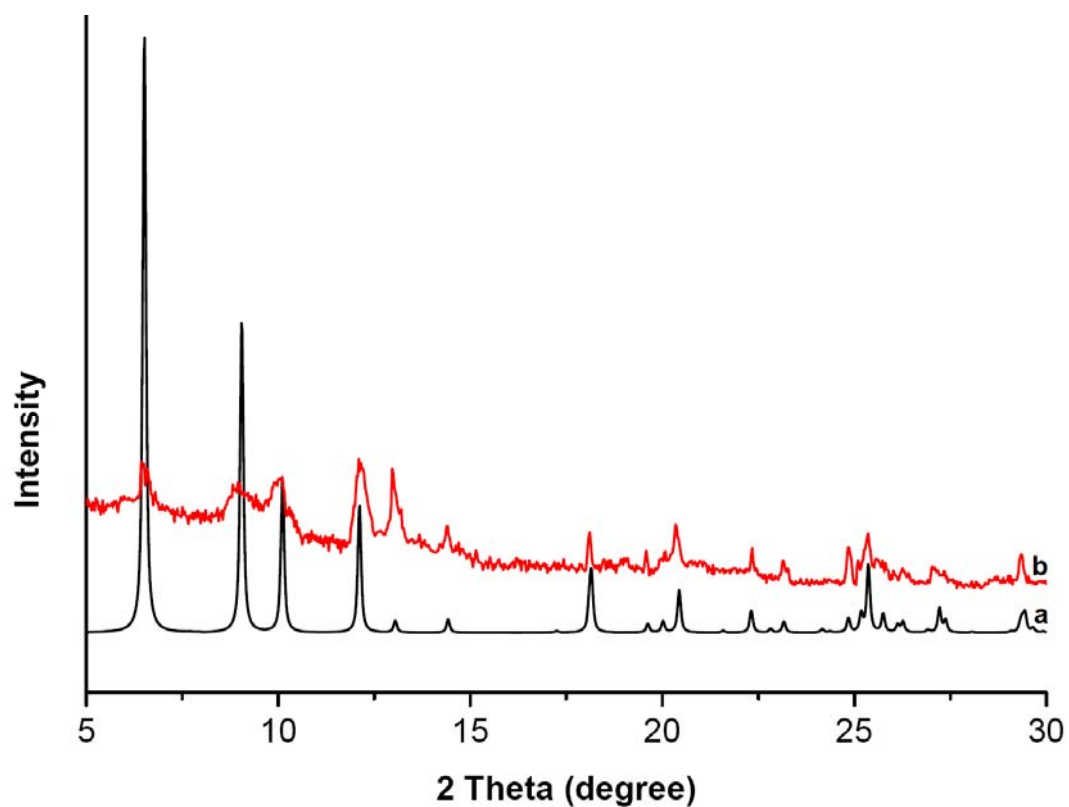

**Figure S1.** PXRD patterns for **1**. (a) simulated; (b) a single-phase polycrystalline sample of **1**

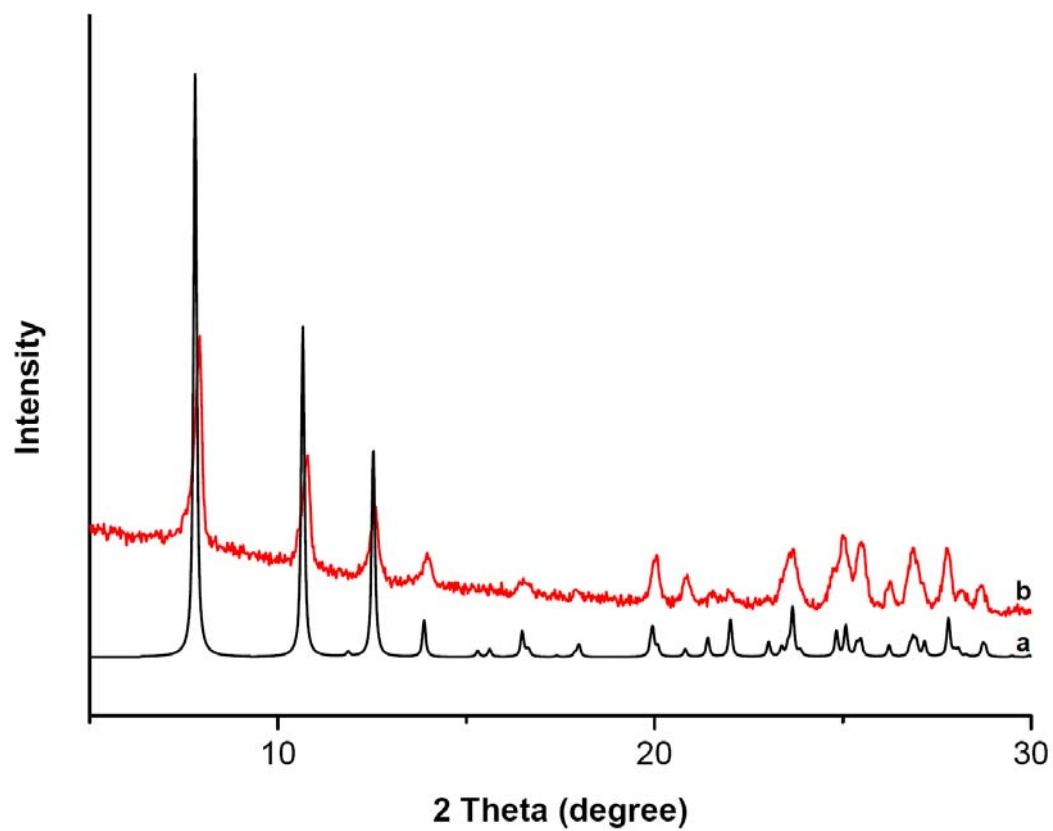

**Figure S2.** PXRD patterns for **2**. (a) simulated; (b) a single-phase polycrystalline sample of **2**

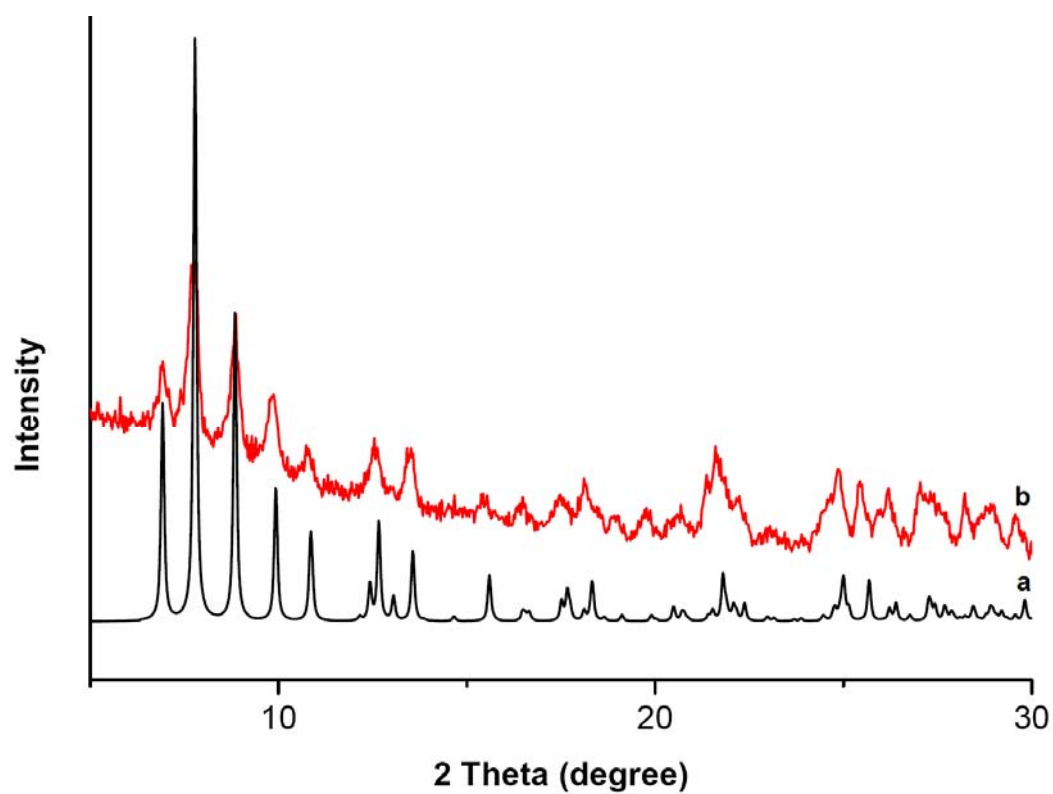

**Figure S3.** PXRD patterns for **3**. (a) simulated; (b) a single-phase polycrystalline sample of **3**

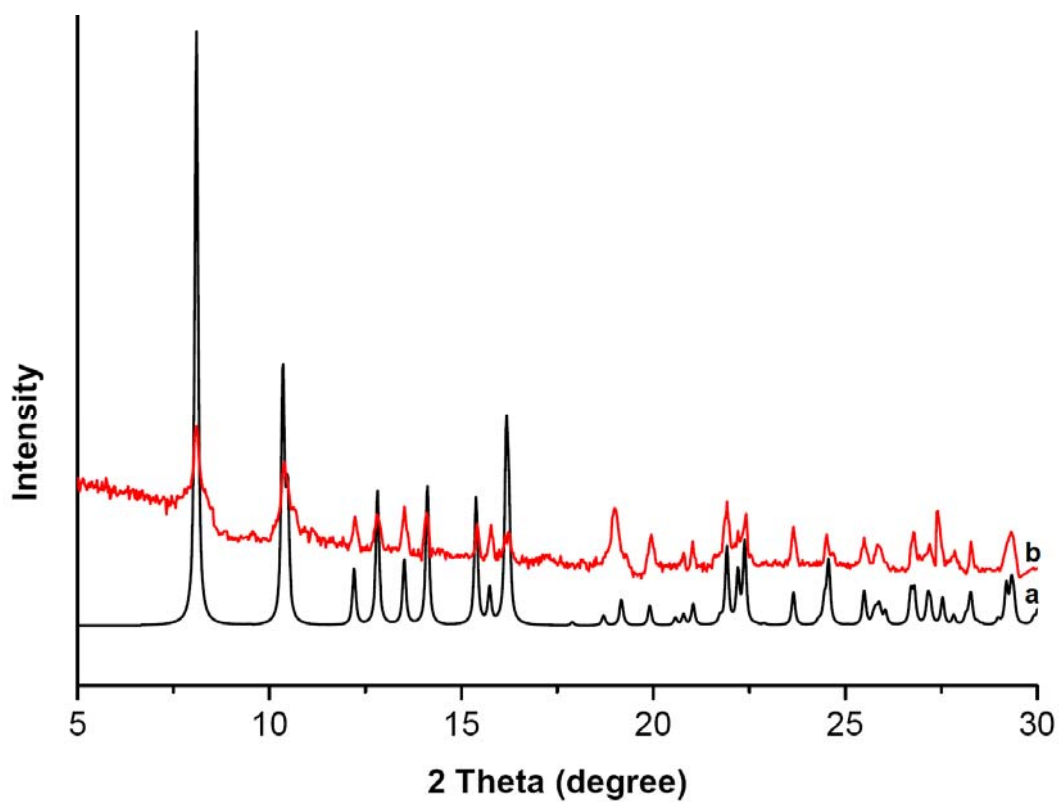

**Figure S4.** PXRD patterns for **4**. (a) simulated; (b) a single-phase polycrystalline sample of **4**

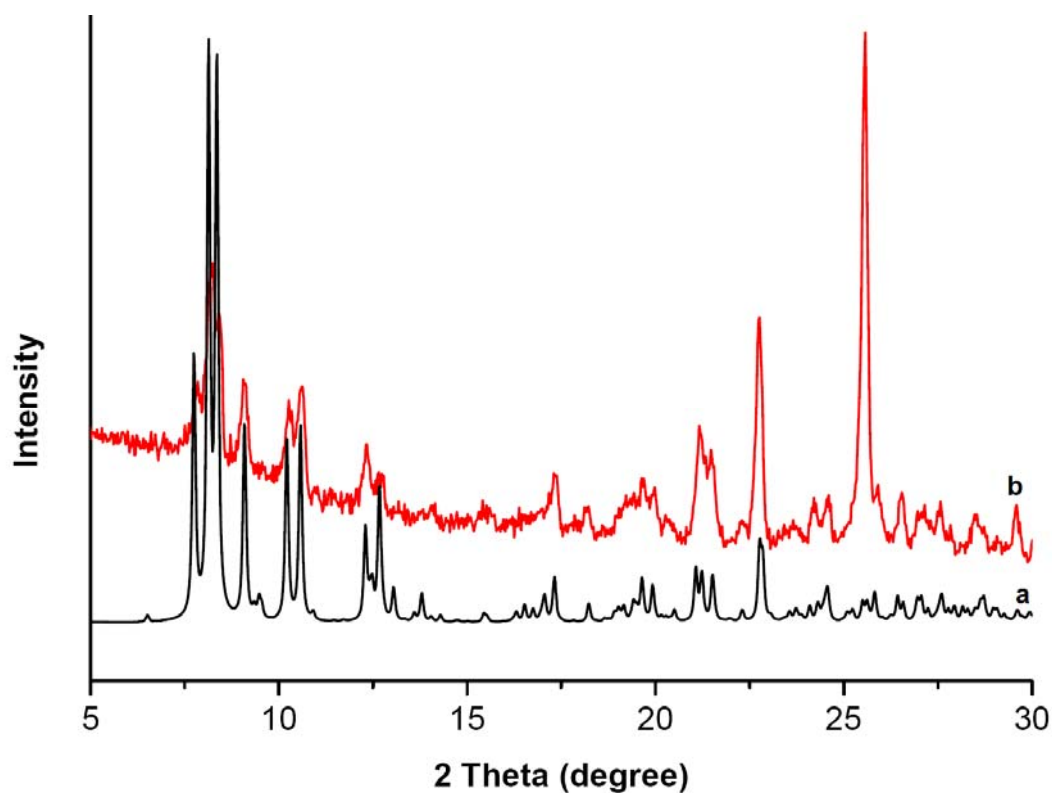

**Figure S5.** PXRD patterns for **5**. (a) simulated; (b) a single-phase polycrystalline sample of **5**

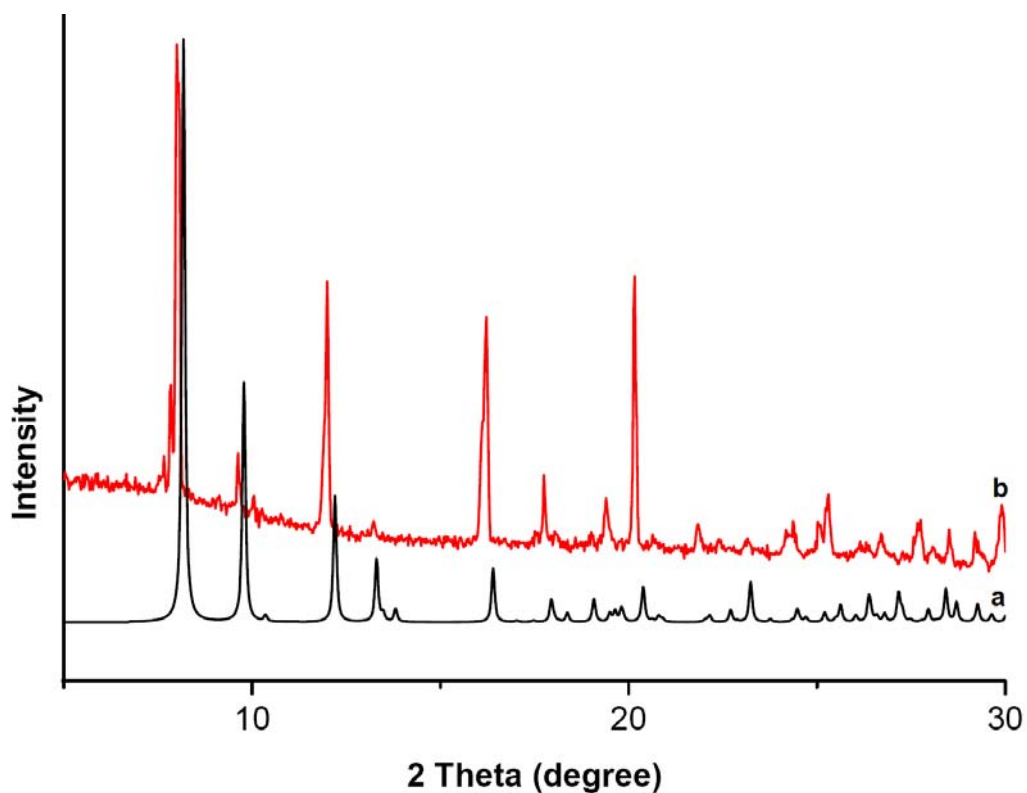

**Figure S6.** PXRD patterns for **6**. (a) simulated; (b) a single-phase polycrystalline sample of **6**

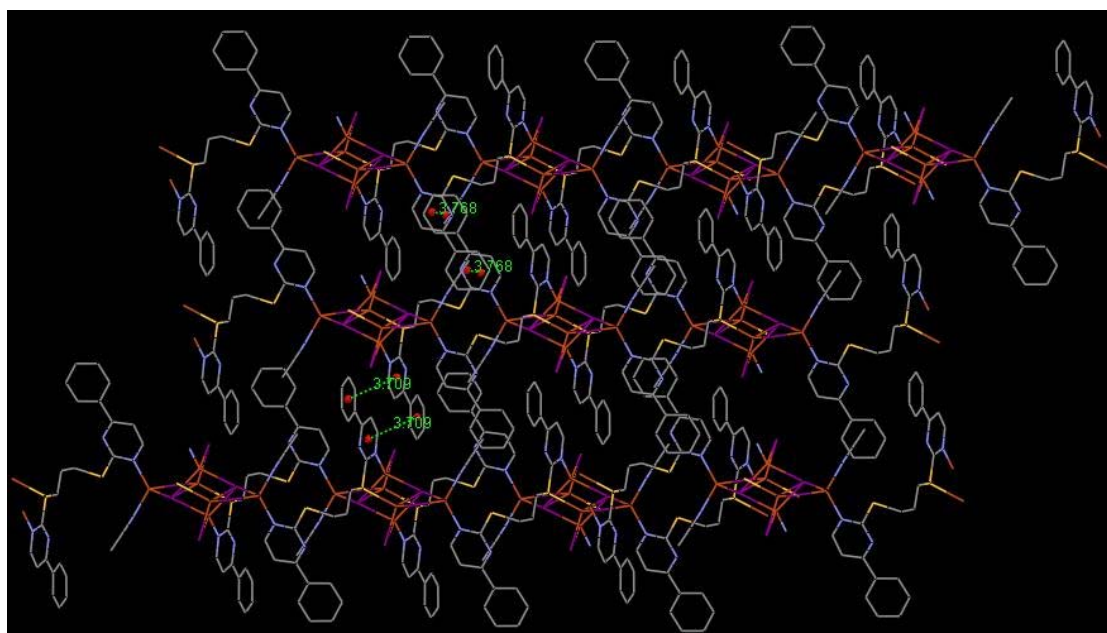

Fig. S7.  $\pi$ - $\pi$  interactions between the phenyl and pyrimidyl rings of bphpypr ligand of **3**.

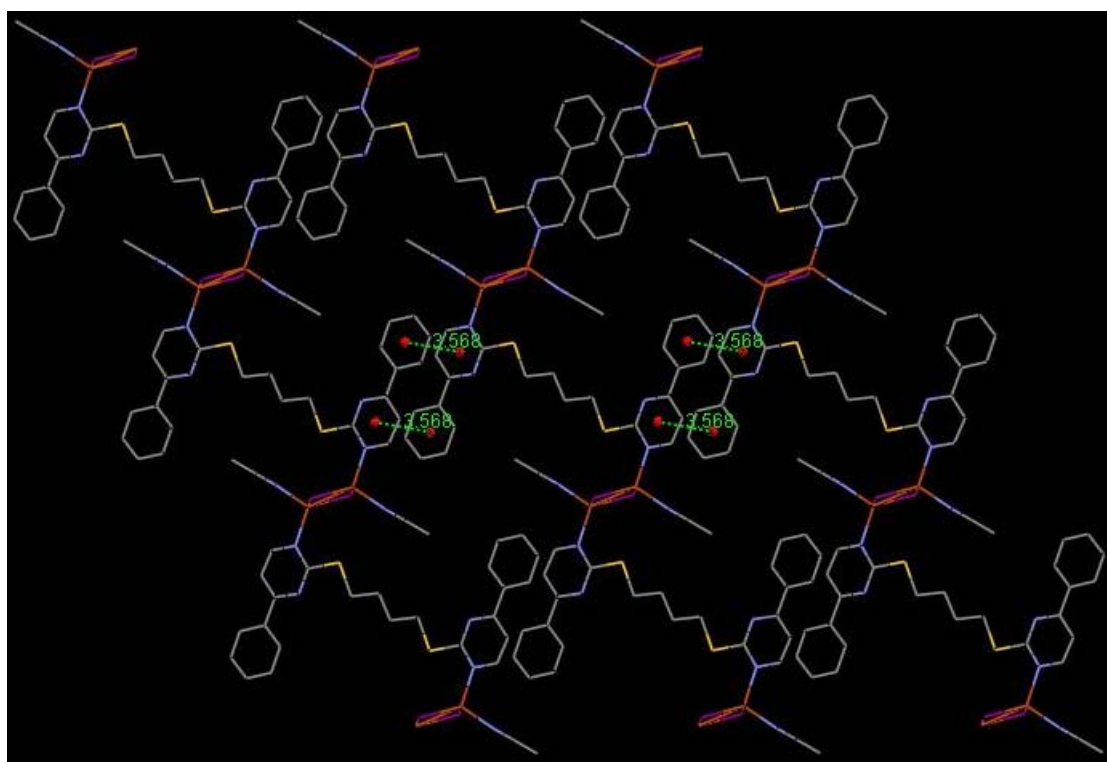

Fig. S8.  $\pi$ - $\pi$  interactions between the phenyl and pyrimidyl rings of bphpypr ligand of **4**.
